# Supplementary figures and images for: Direct radiocarbon analysis of exhaled air
Source: Royal Society of Chemistry journal article supplement (doi:10.1039/c0ja00039f), 2010-10-07

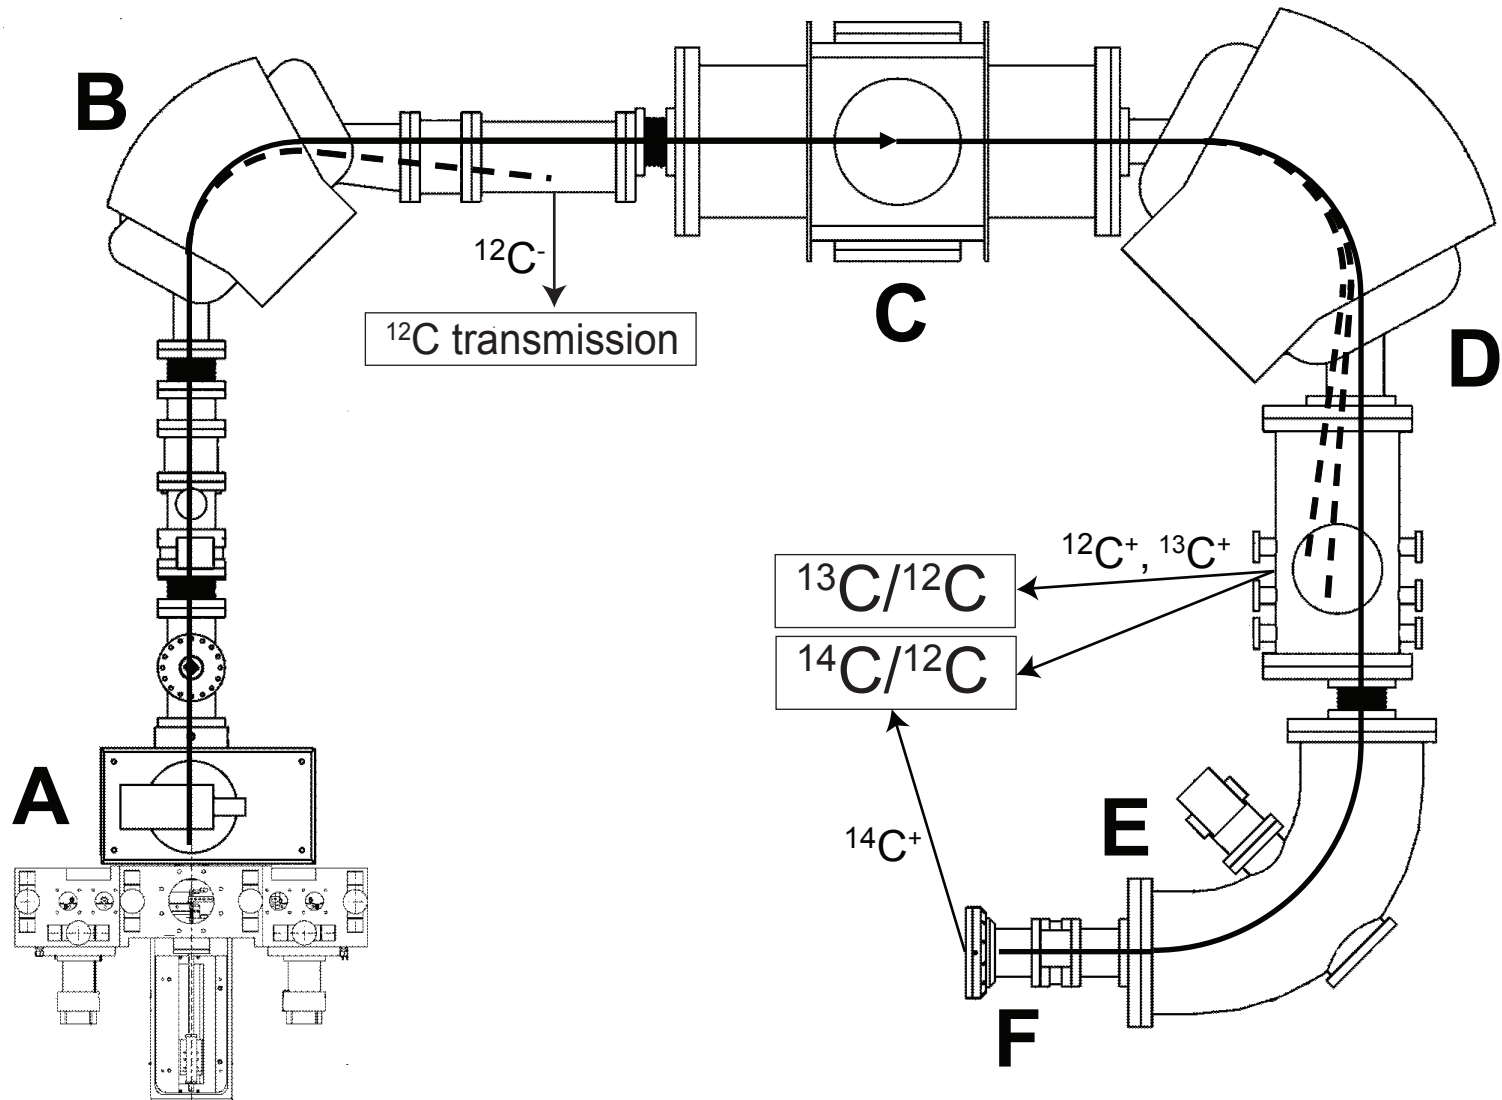

Supplement: c0ja00039ffig1.pdf [file c0ja00039ffig1.pdf]

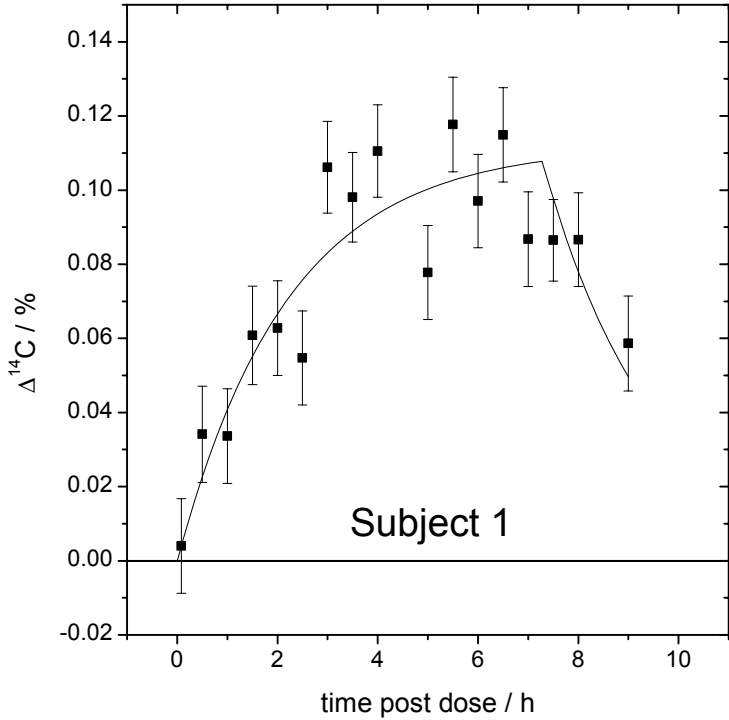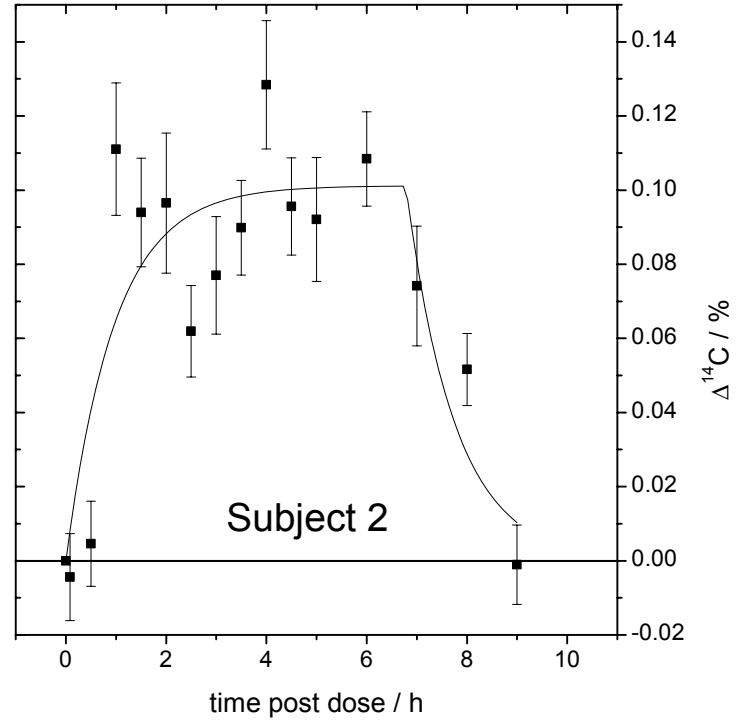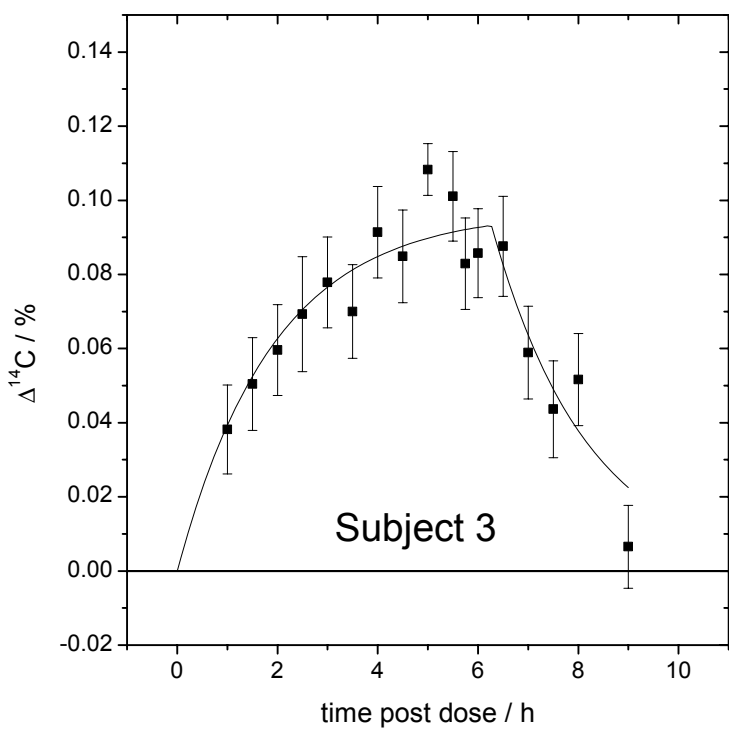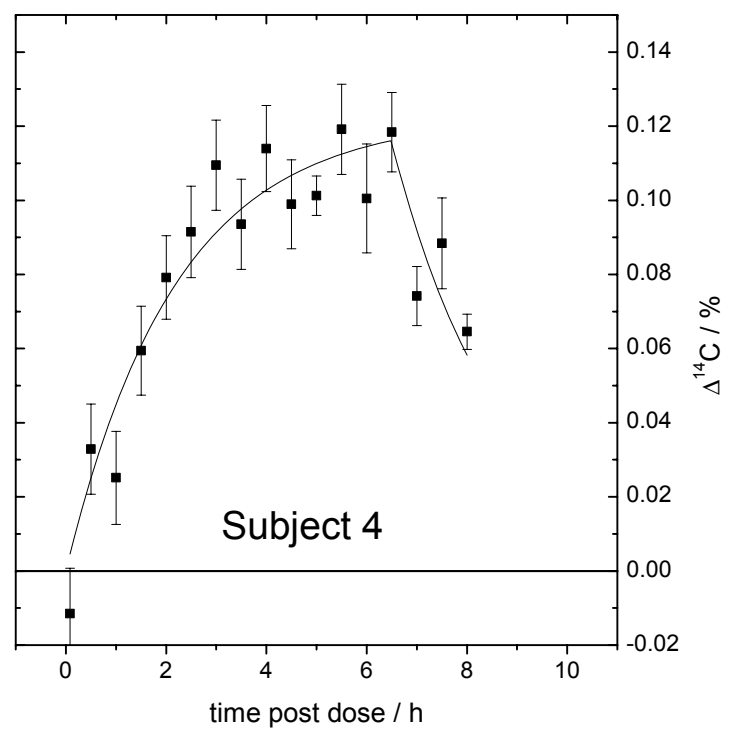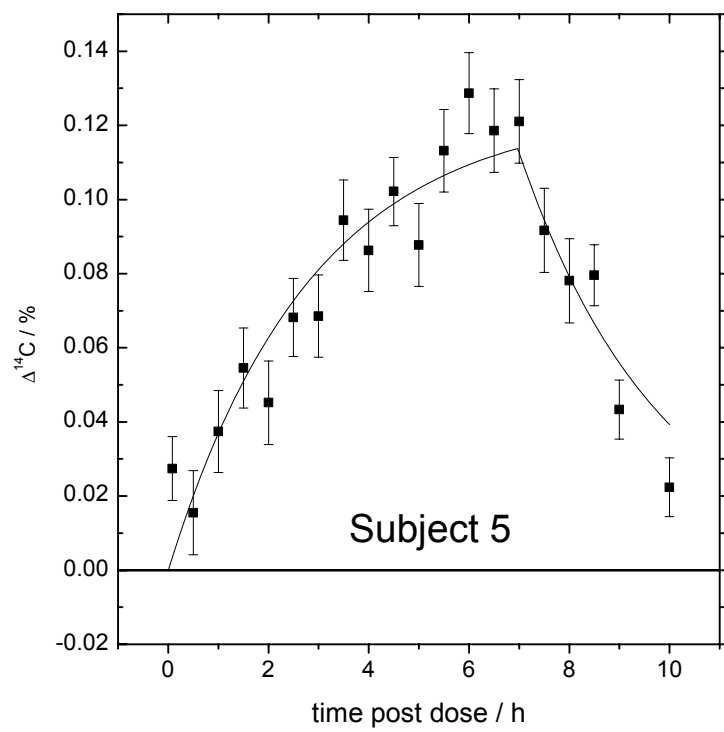

Supplement: c0ja00039ffig2.pdf [file c0ja00039ffig2.pdf]

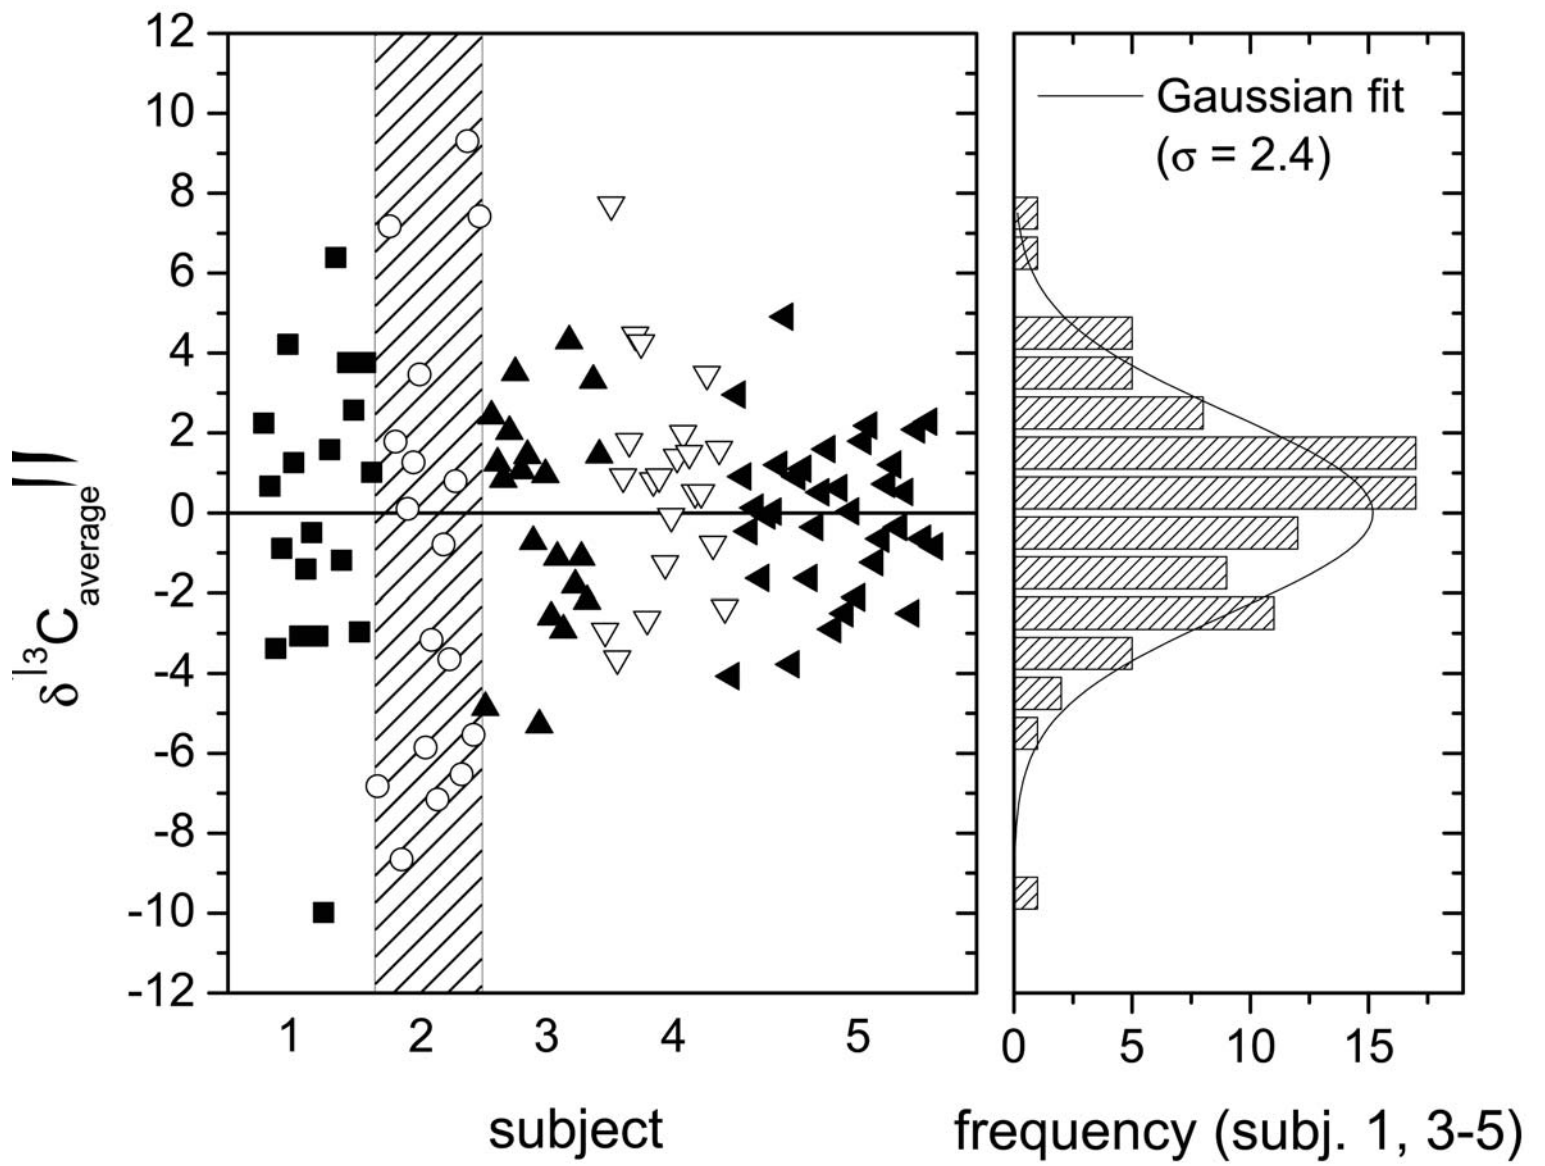

Supplement: c0ja00039ffig3.pdf [file c0ja00039ffig3.pdf]
